# Supplementary material
Source: publisher site journal article supplement (https://www.degruyterbrill.com/publication/isbn/9783035614213/downloadAsset/9783035614213_Contents.pdf)
Supplement: Supplementary file 1 [file 9783035614213_Contents.pdf]

# TABLE OF CONTENTS

|                                                                                                                                                                                                                                                                                                                                                                                                                                                                                                                                          |            |
|------------------------------------------------------------------------------------------------------------------------------------------------------------------------------------------------------------------------------------------------------------------------------------------------------------------------------------------------------------------------------------------------------------------------------------------------------------------------------------------------------------------------------------------|------------|
| <b>FOREWORD</b>                                                                                                                                                                                                                                                                                                                                                                                                                                                                                                                          | <b>6</b>   |
| <b>I GENIUS</b>                                                                                                                                                                                                                                                                                                                                                                                                                                                                                                                          | <b>15</b>  |
| I THE ALTERED STATE 18 — II SEIZING THE MOMENT 19                                                                                                                                                                                                                                                                                                                                                                                                                                                                                        |            |
| <b>II THE TASK IN HAND</b>                                                                                                                                                                                                                                                                                                                                                                                                                                                                                                               | <b>21</b>  |
| I THE RED HERRING: SUSTAINABILITY 23 — II A CATEGORICAL LEAP 24 — III THE CURRENT CONTEXT 25 — IV WHO WE ARE 27 — V WHERE WE'RE COMING FROM... 29 — VI ...AND WHERE WE WANT TO GO 37 — VII A PATHWAY OPEN TO EVERYONE 40 — VIII THE 'POTENTIALITY OF APPLICATIONS' 42 — IX THE 'RESOURCE' THAT MULTIPLIES FOREVER 44 — X THE LEVELLER: DEMOCRACY IN THE NETWORK 45                                                                                                                                                                       |            |
| <b>III ENERGY IS NOT THE PROBLEM</b>                                                                                                                                                                                                                                                                                                                                                                                                                                                                                                     | <b>49</b>  |
| I DEALING WITH OBSTACLES ON THE WAY 53 — II PREMISE PART 1: THE ISSUE IS LOGISTICS 54 — III PREMISE PART 2: WE HAVE ENERGY THAT GETS CHEAPER THE MORE OF IT WE USE 55 — IV PREMISE PART 3: THE KEY IS NETWORKED ELECTRICITY 59 — V CAN DO VS HAVE TO 61 — VI FORMULATING A DIFFERENT KIND OF QUESTION 63 — VII THE VISION: 'ALWAYS ON' POWER 66 — VIII OUR 135-YEAR LAG 66 — IX ABUNDANCE 68 — X THE FEAR OF GOD 69 — XI MORE IS MORE 71                                                                                                 |            |
| <b>IV A QUICK REFRESHER ON ELECTRICITY</b>                                                                                                                                                                                                                                                                                                                                                                                                                                                                                               | <b>77</b>  |
| I THE DYNAMO/GENERATOR 83 — II AC/DC 84 — III THE TRANSFORMER 85 — IV WHERE IT ALL COMES FROM 87 — V WHERE MUCH OF IT COULD BE COMING FROM INSTEAD 88                                                                                                                                                                                                                                                                                                                                                                                    |            |
| <b>V THE NETWORK: SHARING POWER</b>                                                                                                                                                                                                                                                                                                                                                                                                                                                                                                      | <b>91</b>  |
| I POWER SHIFTS OF A DIFFERENT KIND 93 — II THE NETWORK EFFECT AND ENERGY 95 — III LIFE AFTER FOSSILS 97 — IV 'INTELLIGENT ENERGY' 99 — V NETWORK TERMINOLOGY 101 — VI OUR FRIEND THE ELECTRON 102 — VII THE ENERGY NETWORK: AN 'INTERNET OF THINGS' 104 — VIII WHAT WE USE ENERGY FOR 108                                                                                                                                                                                                                                                |            |
| <b>VI MAKING IT HAPPEN: A TURNKEY TECHNOLOGY</b>                                                                                                                                                                                                                                                                                                                                                                                                                                                                                         | <b>111</b> |
| I GENESIS OF AN INVENTION 114 — II THE MISSING LINK 117 — III HOW IT WORKS 119 — IV THE DIGITALSTROM CHIP 123 — V APPLICATIONS 125 — VI NETWORK SOLIDARITY 127 — VII TRADING ELECTRICITY 131 — VIII SMART METERS 133 — IX A TYPICAL INSTALLATION 134                                                                                                                                                                                                                                                                                     |            |
| <b>VII THREE CASE STUDIES</b>                                                                                                                                                                                                                                                                                                                                                                                                                                                                                                            | <b>137</b> |
| I SWITZERLAND 138 — II INDIA 142 — III ETHIOPIA 146                                                                                                                                                                                                                                                                                                                                                                                                                                                                                      |            |
| <b>VIII THE BIGGER PICTURE</b>                                                                                                                                                                                                                                                                                                                                                                                                                                                                                                           | <b>151</b> |
| I THE YOGHURT PHENOMENON 152 — II THE APPLICATION PRINCIPLE FORETOLD 156 — III CULTIVATING OUR ENERGY EXPERIENCE 158 — IV PRINTED ENERGY: PHOTOVOLTAICS 158 — V THE POWER OF EXPONENTIAL GROWTH 163 — VI ENERGY AND ARCHITECTURE 166 — VII THE ROLE OF THERMODYNAMICS 169 — VIII UNTAPPED ENERGY: EXERGY 178 — IX INFINITE SOURCES OF ENERGY 181 — X NUCLEAR 187                                                                                                                                                                         |            |
| <b>IX A PLANET IN CRISIS: INTELLECT TO THE RESCUE</b>                                                                                                                                                                                                                                                                                                                                                                                                                                                                                    | <b>193</b> |
| I THREE GENERATIONS OF ENERGY 194 — II A PATH OF RATIONAL OPTIMISM 199 — III "THIS IS OF THE DEVIL" — FACING OPPOSITION 204 — IV THE DIFFICULTY OF THE NEW 207 — V LEAPS OF THE IMAGINATION 209 — VI POWER STORIES 211 — VII THINKING ENERGY 213 — VIII OUR EVOLVING TAKE ON ENERGY 215 — IX ABSTRACT ENERGY 216 — X ENERGY AND SYMBOLS 219 — XI NUMBERS AND ELECTRICITY 223 — XII POWER THROUGH THOUGHT 229 — XIII MEDIAL ENERGY 230 — XIV POPULATIONS AND MODELS 232 — XV LEARNING TO LOVE UNCERTAINTY 237 — XVI BEYOND TECHNOLOGY 239 |            |
| <b>X THE OUTLOOK: WHAT NEXT?</b>                                                                                                                                                                                                                                                                                                                                                                                                                                                                                                         | <b>243</b> |
| I AND WHAT ABOUT ME? 246                                                                                                                                                                                                                                                                                                                                                                                                                                                                                                                 |            |
| <b>CONCLUSION</b>                                                                                                                                                                                                                                                                                                                                                                                                                                                                                                                        | <b>250</b> |
| <b>APPENDIX</b>                                                                                                                                                                                                                                                                                                                                                                                                                                                                                                                          | <b>253</b> |
| <b>REFERENCE</b>                                                                                                                                                                                                                                                                                                                                                                                                                                                                                                                         | <b>257</b> |
